# Supplementary material for: DNA methylation changes during preimplantation development reveal inter-species differences and reprogramming events at imprinted genes
Source: PubMed Central journal article supplement (PMC7216732; doi:10.1186/s13148-020-00857-x), 2020-05-11
Supplement: 13148_2020_857_MOESM1_ESM.pdf [file 13148_2020_857_MOESM1_ESM.pdf]

**Supplementary Table 1a.** Sequencing output for DNA libraries from bovine samples.

| <b>Sample</b> | <b>Total reads</b> | <b>Aligned reads</b> | <b>Uniquely aligned reads</b> | <b>Duplication rate, %</b> | <b>Number of unique CpG covered</b> | <b>% methylated CpG</b> | <b>% methylated CHG</b> | <b>% methylated CHH</b> |
|---------------|--------------------|----------------------|-------------------------------|----------------------------|-------------------------------------|-------------------------|-------------------------|-------------------------|
| Sperm bull 1  | 69,090,542         | 39,378,678           | 35,418,569                    | 10,1                       | 18010659                            | 78,0                    | 0,7                     | 0,7                     |
| Sperm bull 2  | 48,530,352         | 28,559,871           | 26,112,115                    | 8,6                        | 15694987                            | 73,9                    | 0,7                     | 0,7                     |
| Oocyte        | 259,049,767        | 96,826,156           | 31,538,826                    | 32,6                       | 16580914                            | 44,0                    | 5,3                     | 7,6                     |
| 2-cell_1      | 43,533,718         | 26,259,403           | 18,347,564                    | 30,1                       | 12621399                            | 41,9                    | 3,0                     | 1,7                     |
| 2-cell_2      | 42,077,721         | 26,650,377           | 17,396,648                    | 34,7                       | 11910607                            | 43,2                    | 3,0                     | 1,8                     |
| 8-cell_2      | 56,735,461         | 32,266,646           | 27,016,443                    | 16,1                       | 15727281                            | 41,0                    | 1,6                     | 1,1                     |
| 8-cell_2      | 11,473,611         | 7,055,457            | 5,371,611                     | 23,9                       | 14841042                            | 47,5                    | 2,0                     | 1,4                     |
| Morula_1      | 39,270,891         | 24,330,027           | 19,383,765                    | 20,3                       | 11881737                            | 41,0                    | 1,4                     | 1,2                     |
| Morula_2      | 27,448,301         | 17,515,637           | 14,819,766                    | 15,4                       | 10488824                            | 46,4                    | 1,8                     | 1,5                     |
| Blastocyst_1  | 133,179,441        | 78,091,499           | 52,593,450                    | 32,7                       | 20659761                            | 26,9                    | 0,6                     | 0,5                     |
| Blastocyst_2  | 113,715,292        | 66,115,083           | 46,088,061                    | 30,3                       | 19809100                            | 27,7                    | 0,6                     | 0,5                     |

**Supplementary Table 1b.** Sequencing output for libraries from porcine samples.

| <b>Sample</b> | <b>Total reads</b> | <b>Aligned reads</b> | <b>Uniquely aligned reads</b> | <b>Duplication rate, %</b> | <b>Number of unique CpG covered</b> | <b>% methylated CpG</b> | <b>% methylated CHG</b> | <b>% methylated CHH</b> |
|---------------|--------------------|----------------------|-------------------------------|----------------------------|-------------------------------------|-------------------------|-------------------------|-------------------------|
| Sperm_1       | 73,055,325         | 40,551,088           | 35,207,833                    | 13,2                       | 21,521,487                          | 83,7                    | 0,7                     | 0,7                     |
| Sperm_2       | 66,503,687         | 44,345,269           | 40,960,281                    | 7,6                        | 21,486,398                          | 82,6                    | 0,8                     | 0,8                     |
| Oocyte_1      | 63,289,771         | 49,091,049           | 14,690,679                    | 70,1                       | 11,278,754                          | 53,1                    | 2,7                     | 2,9                     |
| Oocyte_2      | 15,835,299         | 10,535,838           | 5,878,139                     | 44,2                       | 6,317,827                           | 50,9                    | 2,9                     | 3,3                     |
| Oocyte_3      | 15,589,715         | 10,064,346           | 5,298,908                     | 47,3                       | 5,759,096                           | 51,6                    | 2,8                     | 3,2                     |
| Oocyte_4      | 16,578,439         | 10,025,265           | 5,350,633                     | 46,6                       | 5,867,475                           | 54,1                    | 3,4                     | 3,7                     |
| Oocyte_5      | 13,580,648         | 8,856,180            | 4,542,910                     | 48,7                       | 5,142,056                           | 51,6                    | 3,0                     | 3,5                     |
| 2-cell_1      | 36,787,385         | 27,553,946           | 17,378,864                    | 36,9                       | 13,328,572                          | 52,3                    | 1,2                     | 1,1                     |
| 2-cell_2      | 31,993,729         | 21,967,327           | 16,108,398                    | 26,7                       | 13,127,385                          | 55,2                    | 1,8                     | 1,6                     |
| 8-cell_1      | 36,612,497         | 23,626,361           | 14,858,537                    | 37,1                       | 13,491,700                          | 54,2                    | 1,9                     | 1,8                     |
| 8-cell_2      | 35,614,964         | 21,532,427           | 15,469,723                    | 28,2                       | 13,976,045                          | 52                      | 1,3                     | 1,3                     |
| 8-cell_3      | 37,858,003         | 23,962,428           | 18,082,340                    | 24,5                       | 15,307,760                          | 49,5                    | 1,2                     | 1,1                     |
| Morula_1      | 57,620,949         | 45,442,387           | 13,067,608                    | 71,2                       | 9,313,262                           | 51,3                    | 1,0                     | 0,8                     |
| Morula_2      | 40,396,985         | 28,333,818           | 19,041,543                    | 32,8                       | 14,278,021                          | 45,1                    | 1,5                     | 1,3                     |
| Blastocyst_1  | 77,321,112         | 50,114,529           | 29,093,731                    | 41,9                       | 18,058,469                          | 15                      | 1,1                     | 1                       |
| Blastocyst_2  | 57,763,014         | 40,461,906           | 20,899,272                    | 48,3                       | 14,790,384                          | 12,5                    | 1,4                     | 1,3                     |

**Supplementary Table 2.** Sequencing output for RNA-seq libraries from bovine and porcine samples

| <b>Sample</b>  | <b>Total number of sequenced reads</b> | <b>Number of genes covered per library, FPM</b> |
|----------------|----------------------------------------|-------------------------------------------------|
| Pig oocyte     | 9599889                                | 10051                                           |
| Pig 2-4 cell   | 11861244                               | 10546                                           |
| Pig 8-16 cell  | 10775692                               | 11501                                           |
| Pig morula     | 10542646                               | 11218                                           |
| Pig blastocyst | 13347163                               | 10770                                           |
| Cow oocyte     | 9257323                                | 10529                                           |
| Cow 2-4 cell   | 9099864                                | 10828                                           |
| Cow 8-16 cell  | 10549909                               | 11074                                           |
| Cow morula     | 6579584                                | 11216                                           |
| Cow blastocyst | 35090754                               | 10908                                           |

The number of total reads obtained per library supplied in the table only includes reads with high base call PHRED scores

Supplementary Table 3.

100-CpG tiles losing or gaining methylation between the 2-4 and 8-6 cell stages, filtering for tiles changing by >10%

| <b>Specie</b> | <b>Total tiles</b> | <b>Gain (number/%)</b> | <b>Loss (number/%)</b> |
|---------------|--------------------|------------------------|------------------------|
| <b>Pig</b>    | <b>253122</b>      | <b>39105 (15.4%)</b>   | <b>40696 (16.1%)</b>   |
| <b>Cow</b>    | <b>256422</b>      | <b>18941 (7.4%)</b>    | <b>42458 (16.6%)</b>   |

**Supplementary Table 4.** Location of candidate gDMRs with respect to bovine imprinted genes identified by RNA-seq [ref. 9].

| <b>Gene ID</b>     | <b>Gene symbol</b> | <b>Our data<br/>Imprinted Y or N</b> | <b>Located within Kb</b>                           |
|--------------------|--------------------|--------------------------------------|----------------------------------------------------|
| ENSBTAG00000007975 | <i>ALDH8A1</i>     | N                                    |                                                    |
| ENSBTAG00000009725 | <i>AOX1</i>        | N                                    |                                                    |
| ENSBTAG00000019616 | <i>APCS</i>        | N                                    |                                                    |
| ENSBTAG00000036127 | <i>AS3MT</i>       | N                                    |                                                    |
| ENSBTAG00000017716 | <i>BEGAIN</i>      | Y                                    | <i>inside the gene (from the candidate list)</i>   |
| ENSBTAG00000008612 | <i>C1R</i>         | N                                    |                                                    |
| ENSBTAG00000004840 | <i>C1S</i>         | N                                    |                                                    |
| ENSBTAG00000006136 | <i>CDA</i>         | Y(?)                                 | <i>29 Kb (from the candidate list)</i>             |
| ENSBTAG00000031184 | <i>CDKN1C</i>      | Y(?)                                 | <i>17Kb (from the candidate list)</i>              |
| Unannotated*       | <i>COPG2IT1</i>    | Y(?)                                 | <i>19Kb from MEST</i>                              |
| ENSBTAG00000012182 | <i>DIRAS3</i>      | N                                    |                                                    |
| ENSBTAG00000037899 | <i>DLK1</i>        | Y(?)                                 | <i>8Kb (from the candidate list)</i>               |
| ENSBTAG00000017475 | <i>GNAS</i>        | Y(?)                                 | <i>inside the gene (from GNAS1 and GNAS2 DMRs)</i> |
| Unannotated*       | <i>GNASXL</i>      | Y                                    | <i>overlaps with GNAS(1) DMR</i>                   |
| ENSBTAG00000013066 | <i>IGF2</i>        | Y                                    | <i>inside the gene (from the candidate list)</i>   |
| ENSBTAG00000002402 | <i>IGF2R</i>       | Y                                    | <i>inside the gene (from IGF2R(2) DMR)</i>         |
| ENSBTAG00000021801 | <i>INPP5F</i>      | N                                    |                                                    |
| ENSBTAG00000016165 | <i>KRT7</i>        | N                                    |                                                    |
| ENSBTAG00000045998 | <i>MAGEL2</i>      | N                                    |                                                    |
| ENSBTAG00000010128 | <i>NAP1L5</i>      | Y                                    | <i>inside the gene (from Imprinting cow SCB 2)</i> |
| ENSBTAG00000019600 | <i>OOEP</i>        | N                                    |                                                    |
| ENSBTAG00000038093 | <i>PEG10</i>       | Y                                    | <i>inside the gene (from PEG10 DMR)</i>            |
| ENSBTAG00000023338 | <i>PEG3</i>        | Y                                    | <i>inside the gene (from PEG3)</i>                 |
| ENSBTAG00000031194 | <i>PHLDA2</i>      | Y(?)                                 | <i>20Kb (from the candidate list)</i>              |
| ENSBTAG00000026523 | <i>PLAGL1</i>      | N                                    |                                                    |
| ENSBTAG00000034645 | <i>PON3</i>        | N                                    |                                                    |
| ENSBTAG00000024426 | <i>PPP1R9A</i>     | N                                    |                                                    |

**Supplementary Table 4** (Contd). Location of candidate gDMRs with respect to bovine imprinted genes identified by RNA-seq [ref. 9].

|                     |                     |      |                                                  |
|---------------------|---------------------|------|--------------------------------------------------|
| ENSBTAG00000015074  | <i>PTGDS</i>        | Y(?) | <i>14Kb (from the candidate list)</i>            |
| ENSBTAG00000001392  | <i>RDH16</i>        | N    |                                                  |
| ENSBTAG000000046585 | <i>RTL1</i>         | Y    | <i>inside the gene (from the candidate list)</i> |
| ENSBTAG000000019437 | <i>SLFN11</i>       | N    |                                                  |
| ENSBTAG000000021282 | <i>SGCE</i>         | Y    | <i>in the promoter (from PEG10 DMR)</i>          |
| ENSBTAG000000005386 | <i>SLC2A2</i>       | N    |                                                  |
| ENSBTAG000000008251 | <i>SNRPN</i>        | Y    | <i>in the promoter (from SNRPN DMR)</i>          |
| 788661              | <i>USP29^</i>       |      |                                                  |
| ENSBTAG000000045731 | <i>ZIM2^</i>        | N    |                                                  |
| ENSBTAG000000048005 | <i>MGC157368</i>    | N(?) | <i>41 Kb (from iAPEG3 DMR)</i>                   |
| 100298176           | <i>LOC100298176</i> | Y(?) | <i>17 Kb (from APEG3 DMR)</i>                    |
| 104974975           | <i>LOC104974975</i> | N(?) | <i>36 Kb (from APEG3 DMR)</i>                    |
| ENSBTAG000000038326 | <i>LOC508098</i>    | N(?) | <i>61 Kb (from APEG3 DMR)</i>                    |
| 100848981           | <i>LOC100848941</i> | N    |                                                  |
| 101907203           | <i>LOC101907203</i> | N    |                                                  |
| 101907679           | <i>LOC101907679</i> | N    |                                                  |
| 100849023           | <i>LOC100849023</i> | N    |                                                  |
| 101905472           | <i>LOC101905472</i> | N(?) | <i>56 Kb from the candidate list</i>             |
| Unannotated*        | <i>XLOC_045114</i>  | N    |                                                  |
| Unannotated*        | <i>XLOC_012439</i>  | Y(?) | <i>7 Kb the from the candidate list</i>          |
| Unannotated*        | <i>XLOC_052524</i>  | N    |                                                  |
| Unannotated*        | <i>XLOC_009410</i>  | N    |                                                  |

**Supplementary Table 5.** Promoter methylation and CpG coverage - cow.

| Promoter        | CGI at the promoter | Oocyte, % methylation | 2-4 cells, % methylation | 8-16 cells, % methylation | Morula, % methylation | Blastocyst, % methylation | Genomic CpG | Oocyte CpG | 2-4 cell CpG | 8-16 cell CpG | Morula CpG | Blastocyst CpG |
|-----------------|---------------------|-----------------------|--------------------------|---------------------------|-----------------------|---------------------------|-------------|------------|--------------|---------------|------------|----------------|
| DNMT1s_promoter | YES                 | 1.503                 | 4.303562                 | 1.8821604                 | 18.07971              | 1.8218844                 | 85          | 85         | 47           | 68            | 21         | 63             |
| DNMT1o_promoter | NO                  | 20.238                | 30.714287                | 28.333332                 | 35.96154              | 26.729439                 | 17          | 17         | 8            | 16            | 12         | 11             |
| DNMT3A_promoter | NO                  | 99.444                | 69.99835                 | 70.92949                  | 78.34235              | 58.147644                 | 59          | 59         | 44           | 59            | 27         | 59             |
| DNMT3B_promoter | NO                  | 96.864                | 41.261574                | 49.94152                  | 45.454544             | 43.093567                 | 38          | 38         | 19           | 37            | 17         | 35             |
| DNMT3L_promoter | NO                  | 27.40232              | 47.839508                | 46.074074                 | 48.333336             | 27.95139                  | 40          | 40         | 16           | 32            | 13         | 25             |
| UHRF1_promoter  | YES                 | 1.087                 | 4.721442                 | 3.7028904                 | 3.125                 | 2.0527055                 | 171         | 171        | 74           | 97            | 74         | 110            |
| TET1_promoter   | NO                  | 85.185                | 31.597223                | 15.980392                 | 2.3148148             | 20.308441                 | 21          | 21         | 14           | 13            | 13         | 21             |
| TET2_promoter   | NO                  | 63.333                | 64.28571                 | 66.08                     | 65.530304             | 40.641026                 | 20          | 20         | 11           | 20            | 11         | 13             |
| TET3_promoter   | NO                  | 96.809                | 62.59058                 | 66.084946                 | 76.84332              | 57.882477                 | 52          | 52         | 48           | 52            | 34         | 52             |
| TRIM28_promoter | YES                 | 9.343558              | 3.115367                 | 2.8846154                 | 23.944885             | 0.9603181                 | 188         | 188        | 93           | 128           | 60         | 161            |
| ZFP57_promoter  | YES                 | 11                    | 37.185356                | 20.270271                 | 19.396551             | 1.5094926                 | 40          | 40         | 20           | 35            | 23         | 26             |
| ZNF445_promoter | NO                  | 94.791664             | 63.995728                | 74.4124                   | 77.20178              | 49.60694                  | 33          | 33         | 25           | 31            | 19         | 33             |
| DPPA3_promoter  | NO                  | 0                     | 20                       | 17.460318                 | 25.897436             | 19.561403                 | 14          | 14         | 10           | 10            | 10         | 7              |

Genomic CpG: the total number of CpG dinucleotides presented in the given promoter and obtained from genomic assembly

Oocyte (and other stages) CpG: the number of promoter CpGs covered in a given stage

**Supplementary Table 5.** Promoter methylation and CpG coverage - pig.

| Promoter        | CGI at the promoter | Oocyte, % methylation | 2-4 cells, % methylation | 8-16 cells, % methylation | Morula, % methylation | Blastocyst, % methylation | Genomic CpG | Oocyte CpG | 2-4 cell CpG | 8-16 cell CpG | Morula CpG | Blastocyst CpG |
|-----------------|---------------------|-----------------------|--------------------------|---------------------------|-----------------------|---------------------------|-------------|------------|--------------|---------------|------------|----------------|
| DNMT1s_promoter | YES                 | 60.996883             | 49.030304                | 28.468693                 | 36.111111             | 21.16423                  | 94          | 64         | 68           | 94            | 29         | 80             |
| DNMT1o_promoter | NO                  | 11.538462             | 26.309525                | 26.40625                  | 18.918919             | 0                         | 38          | 13         | 17           | 19            | 19         | 11             |
| DNMT3A_promoter | YES                 | 17.86834              | 18.047432                | 6.316                     | 5.620609              | 4.3204365                 | 98          | 50         | 40           | 71            | 37         | 65             |
| DNMT3B_promoter | NO                  | 66.14489              | 45.317726                | 52.264                    | 43.888885             | 10.813492                 | 33          | 24         | 21           | 22            | 10         | 23             |
| DNMT3L_promoter | YES                 | 1.3815061             | 6.327986                 | 7.358                     | 7.674038              | 7.0254593                 | 163         | 93         | 84           | 142           | 96         | 109            |
| UHRF1_promoter  | YES                 | 1.737968              | 2.1436589                | 5.189                     | 5.855856              | 2.8973951                 | 87          | 52         | 45           | 74            | 25         | 47             |
| TET1_promoter   | NO                  | 38.095238             | 45.65972                 | 52.623                    | 43.546                | 23.61111                  | 42          | 10         | 14           | 20            | 15         | 16             |
| TET2_promoter   | YES                 | 0.29761904            | 0.29411766               | 2.467                     | 3.368                 | 2.368                     | 131         | 64         | 46           | 87            | 41         | 71             |
| TET3_promoter   | NO                  | 98.33333              | 89.58333                 | 82.226                    | 73.747086             | 27.920227                 | 39          | 20         | 27           | 39            | 17         | 30             |
| TRIM28_promoter | YES                 | 15.1005745            | 9.0494795                | 4.468006                  | 8.602151              | 0.15625                   | 117         | 69         | 69           | 113           | 69         | 87             |
| ZFP57_promoter  | NO                  | 64.583336             | 50.193798                | 43.914143                 | 40.357143             | 9.042553                  | 41          | 23         | 24           | 43            | 15         | 25             |
| ZNF445_promoter | NO                  | 8.685446              | 10.571428                | 12.526652                 | 20.869566             | 3.4946237                 | 69          | 37         | 36           | 37            | 13         | 47             |

Genomic CpG: the total number of CpG dinucleotides presented in the given promoter and obtained from genomic assembly

Oocyte (and other stages) CpG: the number of promoter CpGs covered in a given stage



**Supplementary Table 6.** Lists of pig and cow pluripotency and zygotic genome activation genes.

**PIG-Pluripotency GENES (Fig 7a)**

KLF4,KLF2,TCF3,TCF3.1,POU5F,ESRRB,KLF5,SOX2,E2F1,SALL4

**PIG- Zygote Genome Activation (Fig 7b)**

MTRF1L, HEY2, HSF2, MFAP1, OIP5, JKAMP, TGFBR1, ZNF79, C9orf78, MED19, PDHX, ATG4D, EPOR, LONP1-202, EPB41L4A, FAM53C, NUDT1, KDELR2, EIF2AK1, TRRAP, CPSF4, POP7, ABHD11, ARMC5, CD2BP2, NUDT16L1, FBXL16, ITPRIPL1, CEP68, PAPOLG, MTIF2, EPCAM-202, HADHA, NOL10, ADAM17, MTSS1, ATAD2, MTDH, ESRP1, OSGIN2, JPH1, ATP6V1H, DUSP12, CKS1B-204, CRTC2, BCAS2, TRIM33, DNTTIP2, FNBP1L, TNRC6B, JOSD1, HOXC13, NUP107, FGFR1OP2, ATP6V1E1, APPL2, SCYL2, AMDHD1, WDR59, BBS2, OGFOD1, DMWD, SAE1, AKT1S1, ZNF304, MAD2L2, RNF19B, AKIRIN1, RIOK3, MCOLN2, FUBP1, ZYG11A, EPS15, EBNA1BP2, EXOC2, BAG2, APOBEC2, MED20, TBCC, MORF4L1, BLM, FAM177A1, SRP54, ACIN1, MAX, NUMB, AHS1, GLRX5, SLBP, KDR, USO1, CUL5, STT3A, NUCKS1, BZW2, GNAI1, TPR, FLVCR1, FIGNL1, DEGS1, TFB2M, KLF5, TPP2, ARHGDI, JMJD6, AMZ2, HOXB3, ANKRD40, NOS2, ERAL1, CRK, ALKBH5, APPL1, PXX, MBD4, HDAC11, ARMC8, FXR1, CLDND1, MORC3, CKS2, KCTD9, DDX54, PTPN11, COX6A1, RNF10, ARL3-202, ARL5A, WDR33, DYNC1I2-205, BARD1, BCS1L, DNAJC21, PDCD6, DSTN, KCNG1, INSIG1, CHCHD3, TMEM185A.

**COW-Pluripotency GENES (Fig 8a)**

SOX2, NANOG, TCF3, TEX10, ESRRB, KLF5, E2F1, SALL4, SMAD1, STAT3, TDGF1, ZFP42

**COW- Zygote Genome Activation (Fig 8b)**

WDR33, CYCT, HNRNPA3, HNRNPA3, HAT1, DYNC1I2, GCA, ARL5A, BARD1, BCS1L, SLC9A1, HMGCL, DUSP12, DEDD, GON4L, FLAD1, FLAD1, CRT2, PRPF3, BCL9, BCAS2, BCAS2, TRIM33, CEPT1, CEPT1, ARHGAP29, DNNTIP2, NEXN, ZYG11A, EPS15, EBNA1BP2, EBNA1BP2, AKIRIN1, GNL2, MIOS, BZW2, BZW2, GNAI1, DLD, TMEM209, CHCHD3, SLC37A3, MRPS33, EZH2, INSIG1, NUDT4, HOXC13, ATF1, TUBA1C, NUP107, CYP27B1, AMDHD1, ACTR6, SCYL2, APPL2, FGFR1OP2, FGFR1OP2, M6PR, NCAPD2, NCAPD2, NCAPD2, ATP6V1E1, MICAL3, JOSD1, MKL1, MKL1, LARP7, LARP7, H2AFZ, H2AFZ, KDR, CEP135, USO1, HAUS3, SLBP, BRD4, BRD4, ATG4D, EPOR, ECSIT, ECSIT, 37316, LONP1, LONP1, 37681, VDAC1, H2AFY, FAM53C, FAM53C, MATR3, PAIP2, TMCO6, TMCO6, HARS, HARS, HARS, G3BP1, EXTL3, FBXO10, TGFBR1, KCTD9, KCTD9, HNRNPK, ISCA1, AUH, CKS2, RNF20, HEY2, HSF2, GOPC, MTRF1L, FAM120B, EPB41L4A, ANP32A, ACIN1, ACIN1, OIP5, OIP5, JKAMP, JKAMP, MAX, AHS1, AHS1, ITPRIPL1, EPCAM, MTIF2, PAPOLG, CEP68, HADHA, HADHA, NOL10, ADAM17, ZNF79, C11H9orf16, C11H9ORF78, C11H9ORF78, C11H9ORF78, ESD, RFXAP, RFC3, KLF5, MYCBP2, TPP2, TMCO3, SEC61A2, DHTKD1, OPTN, RSU1, DSTN, GPCPD1, RAE1, AURKA, AURKA, MAPRE1, EIF6, DPM1, DPM1, KCNG1, EIF2C2, MTSS1, ATAD2, ATP6V1H, RPS20, RPS20, SDCBP, JPH1, MTDH, OSGIN2, E2F5, SNX16, CUL5, FXYD6, FXYD6, RRAS2, ARNTL, DEPDC7, PDHX, PDHX, PDHX, MED19, MED19, NUCKS1, DEGS1, TFB2M, TFB2M, METTL13, MAD2L2, ADIPOR1, TSEN15, PRG4, PRG4, FLVCR1, KCNH1, LRBA, CLGN, ANKRD50, PSMD9, DDX54, DDX54, PTPN11, COX6A1, RNF10, HSCB, HSCB, WDR59, ATMIN, BBS2, OGFOD1, OGFOD1, OGFOD1, CDH1, BCKDHA, BCKDHA, CLPTM1, DMPK, DMWD, SAE1, LIG1, LIG1, AKT1S1, AKT1S1, AKT1S1, ZNF304, NOS2, NOS2, NOS2, NOS2, FOXN1, ERAL1, ERAL1, ERAL1, FLOT2, CRK, NUP88, NUP88, ODF4, ALKBH5, ANKRD40, ANKRD40, LUC7L3, ANKRD40, ANKRD40, PHB, HOXB3, MSL1, GHDC, STAT3, ATP6V0A1, ARHGDI1, JMJD6, JMJD6, GGA3, GGA3, AMZ2, UTP15, UTP15, GPBP1,
